# Supplementary material for: On the structural stability of crystalline ceria phases in undoped and acceptor-doped ceria materials under in situ reduction conditions
Source: PubMed Central journal article supplement — CrystEngComm. 2018 Dec 3;21(1):145–54. doi: 10.1039/c8ce01726c (PMC6394889; doi:10.1039/c8ce01726c), 2018-12-03
Supplement: CE-021-C8CE01726C-s001.pdf [file CE-021-C8CE01726C-s001.pdf]

## Supporting Information

### On the structural stability of crystalline ceria phases in undoped and acceptor-doped ceria materials under *in situ* reduction conditions

Maged F. Bekheet,<sup>‡</sup> Matthias Grünbacher,<sup>†</sup> Lukas Schlicker,<sup>‡</sup> Albert Gili<sup>‡</sup>, Andrew Doran<sup>#</sup>,  
Jan Dirk Epping,<sup>‡</sup> Aleksander Gurlo,<sup>‡</sup> Bernhard Klötzer,<sup>†</sup> Simon Penner<sup>\*†</sup>

<sup>‡</sup> *Fachgebiet Keramische Werkstoffe/ Chair of Advanced Ceramic Materials, Institut für Werkstoffwissenschaften und -technologien, Technische Universität Berlin, Hardenbergstr. 40, 10623 Berlin, Germany*

<sup>†</sup> *Institute of Physical Chemistry, University of Innsbruck, Innrain 52c, A-6020 Innsbruck*

<sup>#</sup> *Advanced Light Source, Lawrence Berkeley National Laboratory Berkeley, California 94720, USA*

<sup>‡</sup> *Fakultät II : Mathematik & Naturwissenschaften, Institut für Chemie, Technische Universität Berlin, Hardenbergstr. 40, 10623 Berlin, Germany*

**Keywords:** *in situ*, rhombohedral Ce<sub>7</sub>O<sub>12</sub>, triclinic Ce<sub>11</sub>O<sub>20</sub>, X-ray diffraction, hydrogen reduction, bixbyite

\*Corresponding author: Simon Penner, [simon.penner@uibk.ac.at](mailto:simon.penner@uibk.ac.at), Tel: +43 512 507 58003

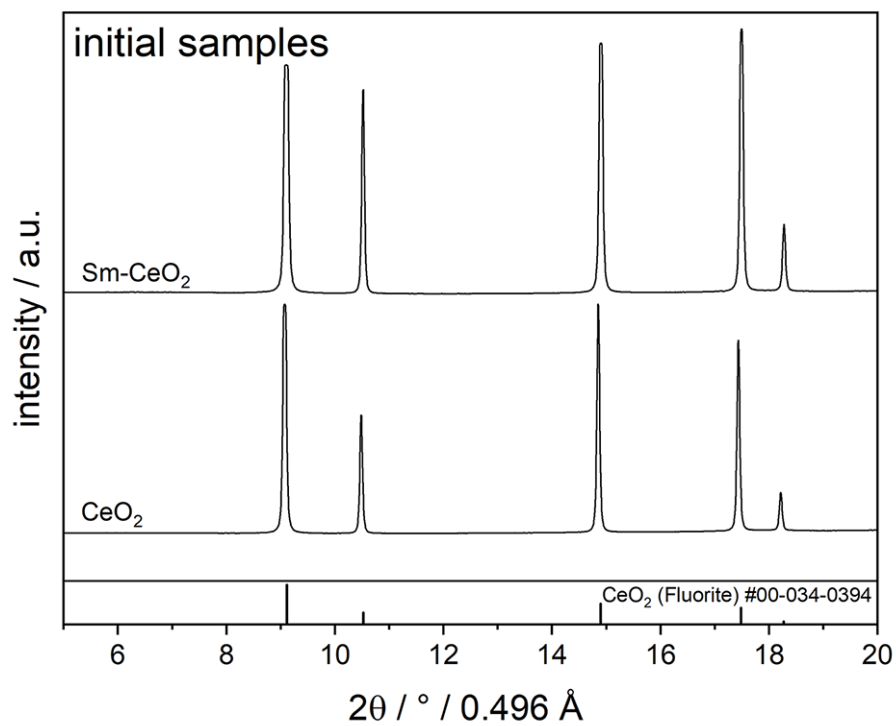

**Figure S1:** X-ray diffraction patterns of the initial ceria materials, corroborating the presence of fluorite-type CeO<sub>2</sub>.

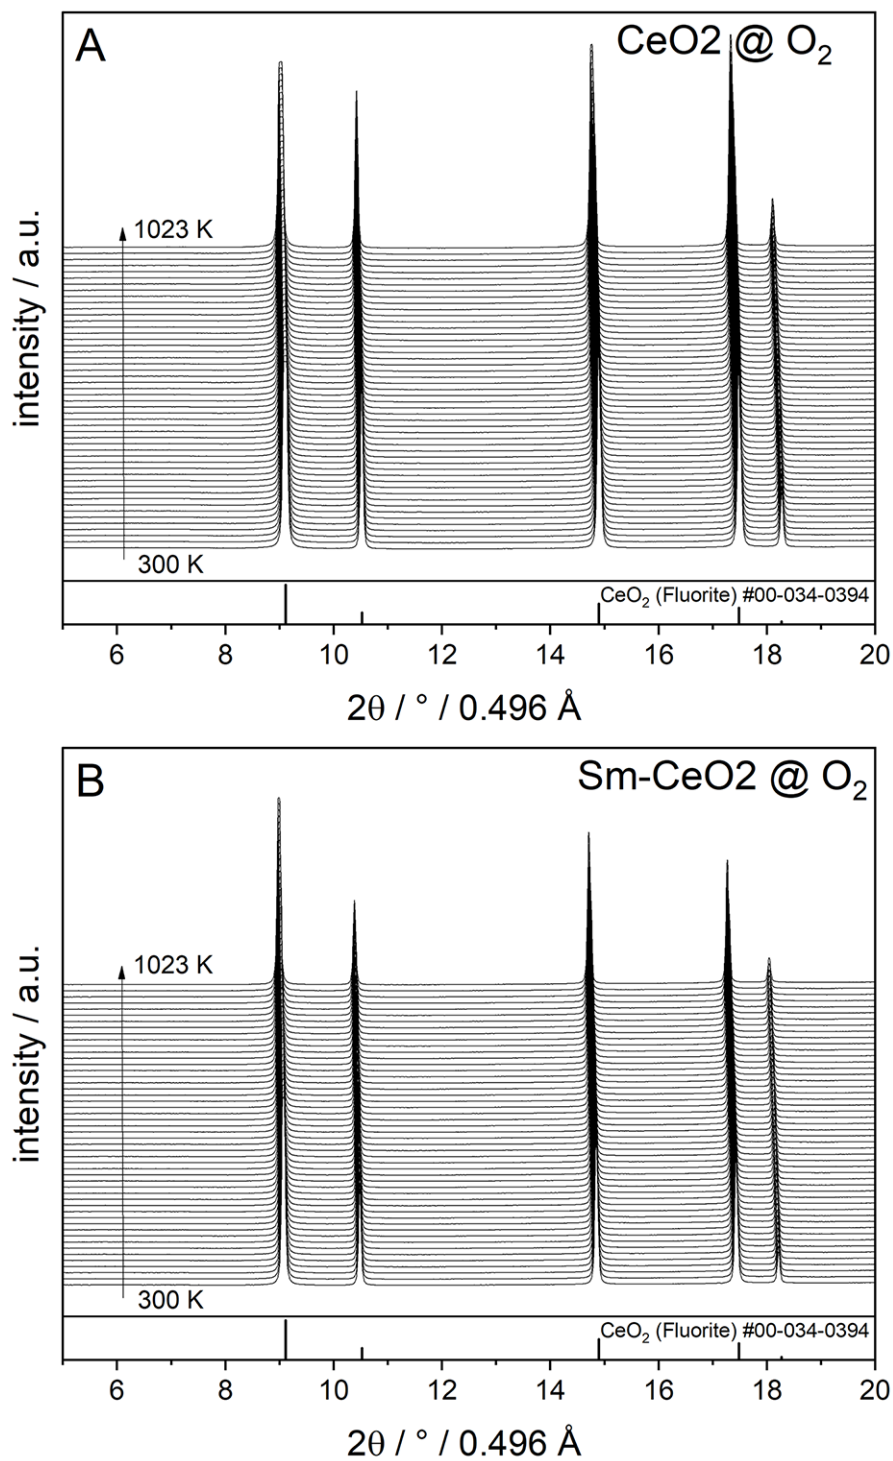

**Figure S2:** Temperature-dependent *in situ* X-ray diffractograms of pure and Sm-doped CeO<sub>2</sub> collected during calcination in oxygen up to 1023 K.

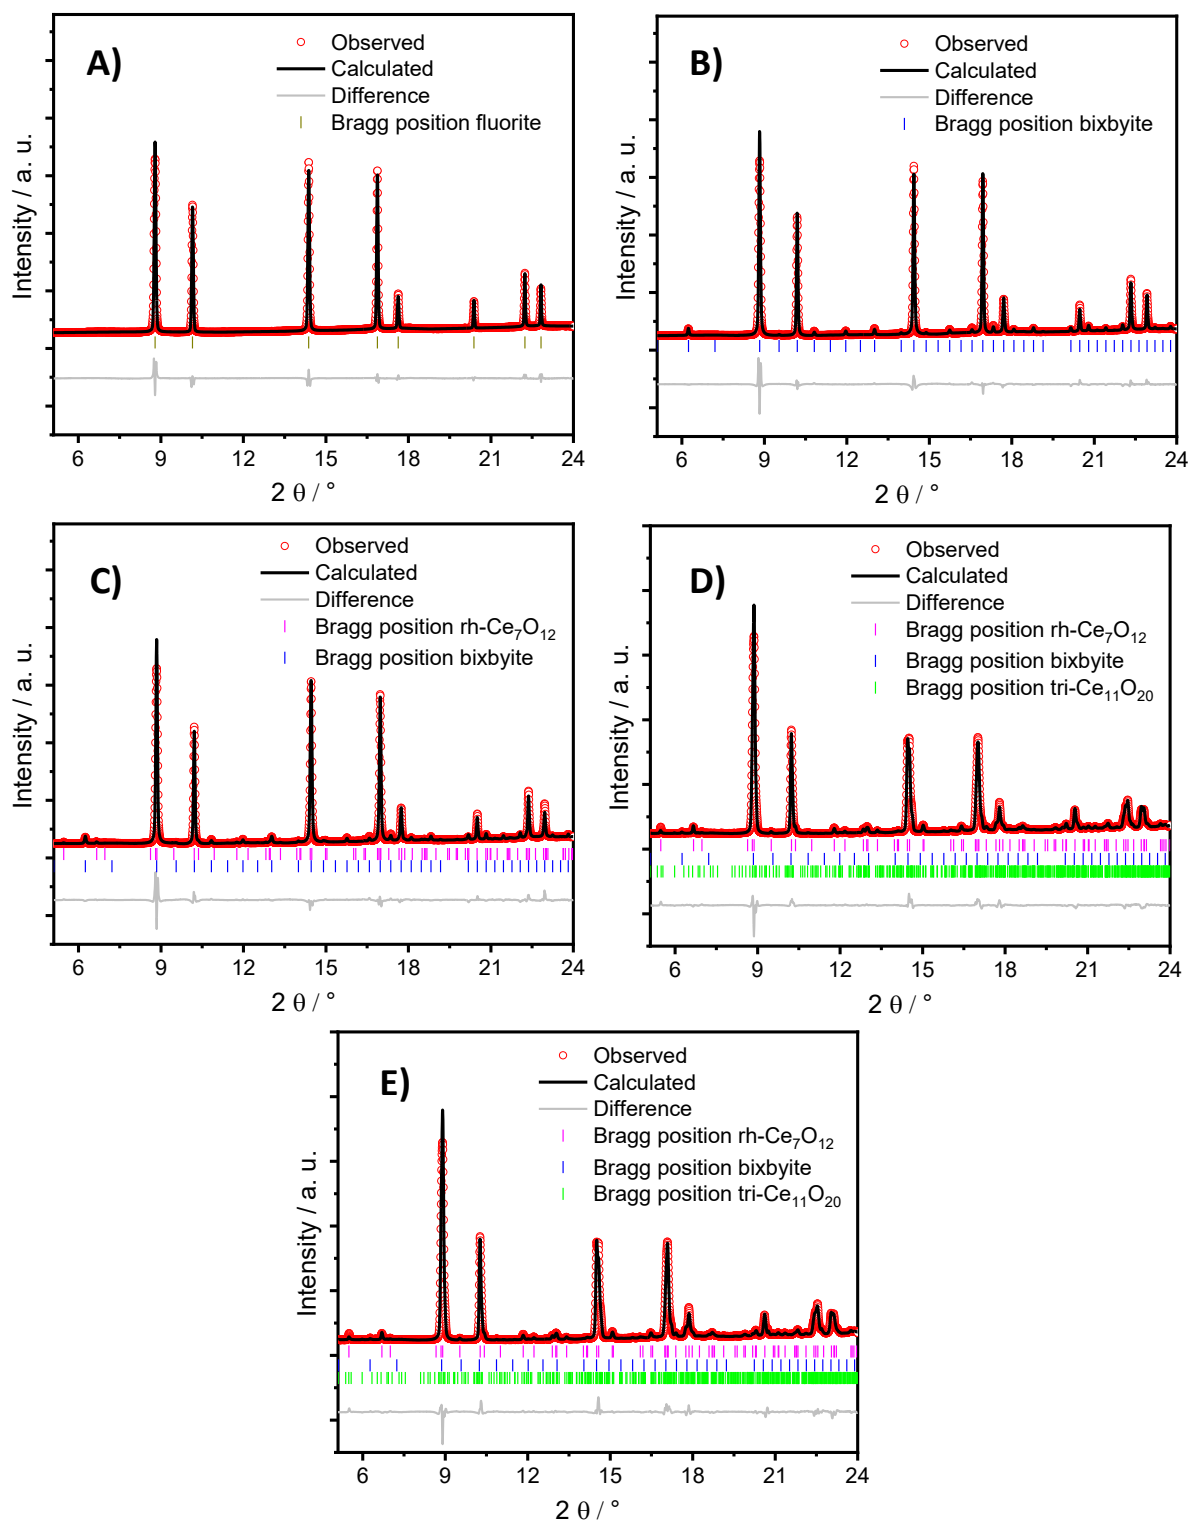

**Figure S3:** Structure refinement of X-ray powder diffraction data collected at 1273 K (A), 1000 K (B), 900 K (C), 600 K (D) and 300 K (E) for pure  $\text{CeO}_2$  sample during cooling from 1273 K in  $\text{H}_2$  atmosphere showing the observed (red circle) and calculated (black solid line) intensities, the calculated Bragg reflections (tick marks), and the difference (gray solid line).

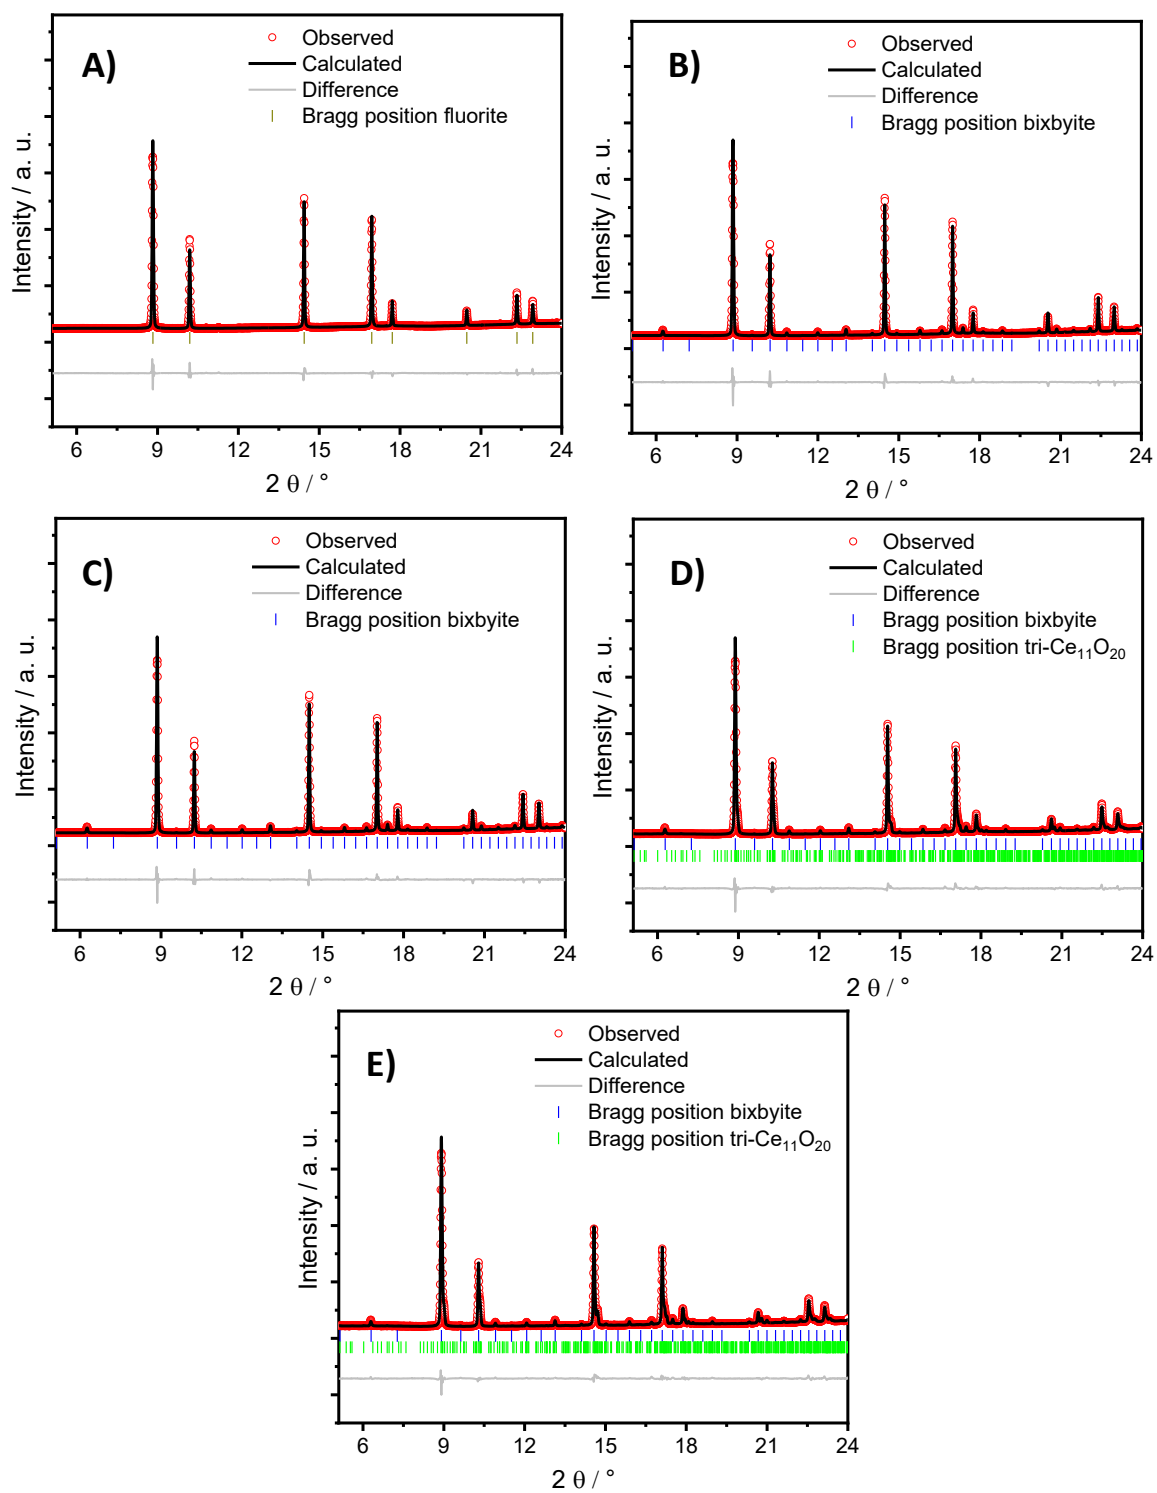

**Figure S4:** Structure refinement of X-ray powder diffraction data collected at 1273 K (A), 1000 K (B), 900 K (C), 600 K (D) and 300 K (E) for SDC15 sample during cooling from 1273 K in H<sub>2</sub> atmosphere showing the observed (red circle) and calculated (black solid line) intensities, the calculated Bragg reflections (tick marks), and the difference (gray solid line).

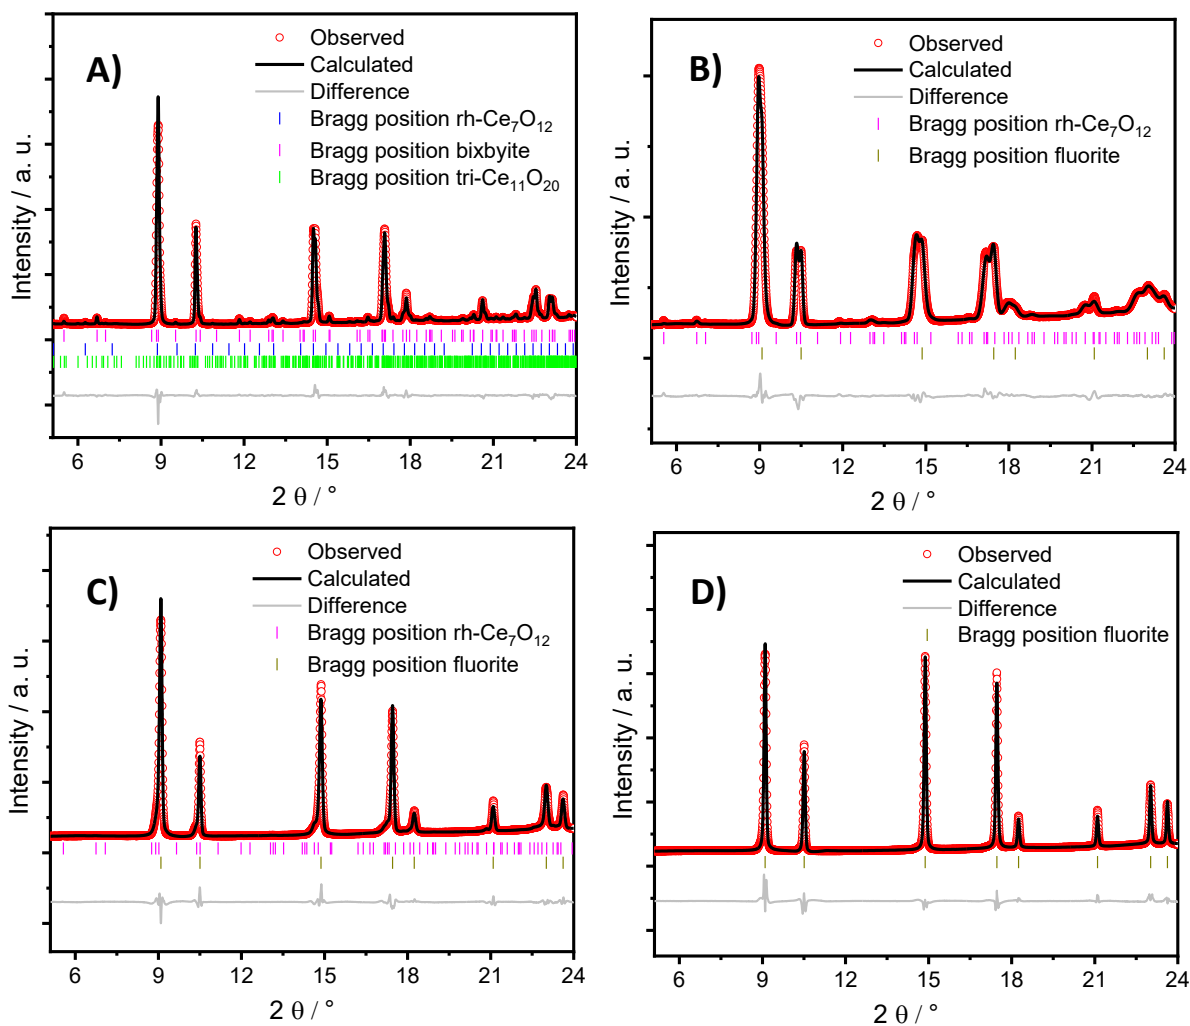

**Figure S5:** Structure refinement of X-ray powder diffraction data collected at 300 K (A), 345 K (B), 375 K (C) and 400 K (D) for pure  $\text{CeO}_2$  sample during re-oxidation in flowing  $\text{O}_2$  atmosphere showing the observed (red circle) and calculated (black solid line) intensities, the calculated Bragg reflections (tick marks), and the difference (gray solid line).

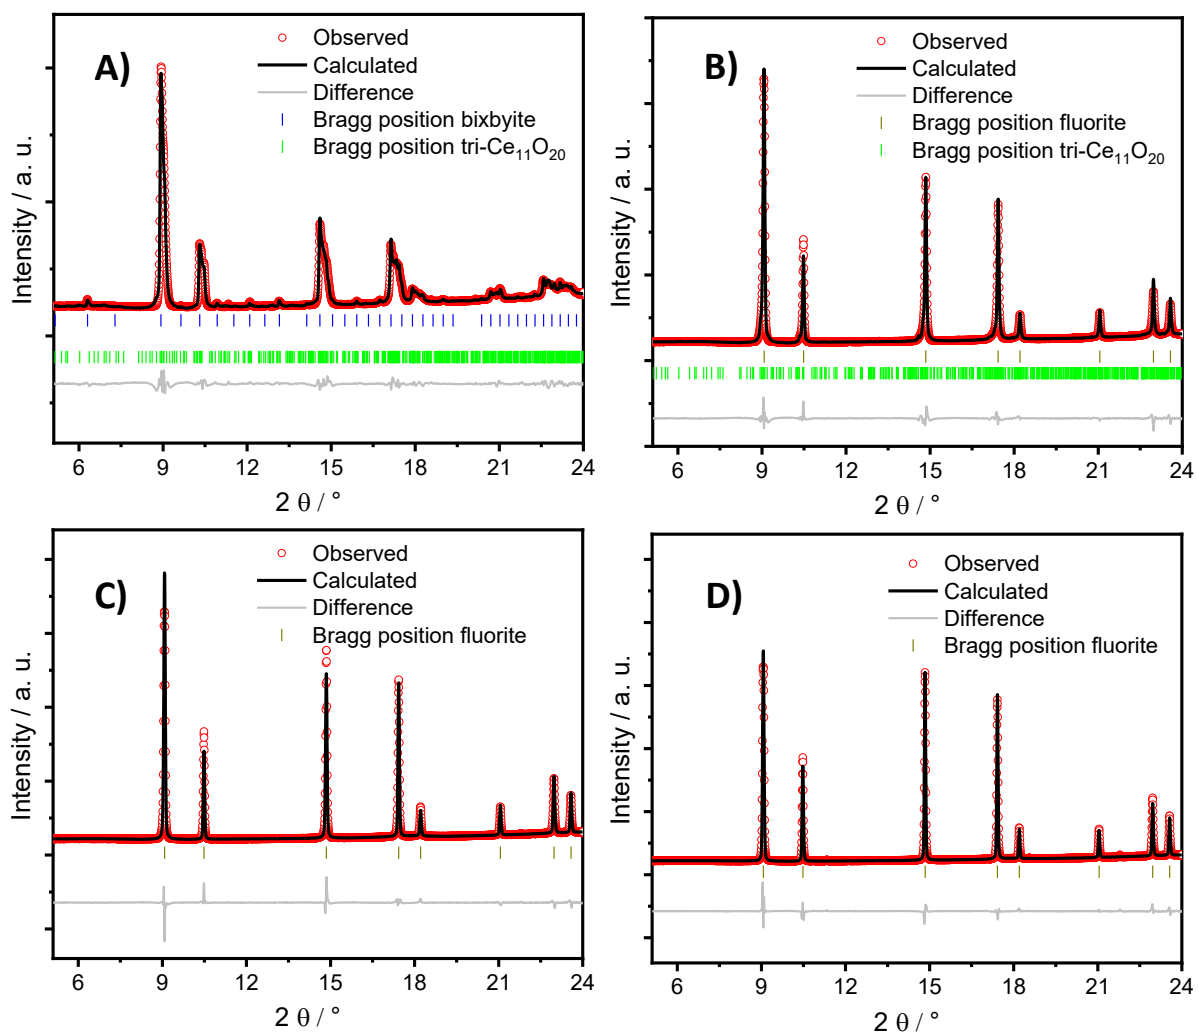

**Figure S6:** Structure refinement of X-ray powder diffraction data collected at 300 K (A), 330 K (B), 345 K (C) and 400 K (D) for SDC15 sample during re-oxidation in flowing O<sub>2</sub> atmosphere showing the observed (red circle) and calculated (black solid line) intensities, the calculated Bragg reflections (tick marks), and the difference (gray solid line).

**Table S1:** A summary of information extracted from XRD patterns by Rietveld refinement of CeO<sub>2</sub> sample after reduction and during cooling in the flowing H<sub>2</sub> atmosphere showing weight fraction wt. [%], lattice parameters a, b, c [Å], the unit cell volume V [Å<sup>3</sup>], lattice angles α, β, γ [°], oxygen vacancy parameter δ and mole fraction y of Ce<sup>3+</sup>. The values of oxygen vacancy parameter δ and mole fraction y of Ce<sup>3+</sup> are calculated according to the relationship between the amount of oxygen (i.e. 2-δ) in CeO<sub>2-δ</sub> and the pseudo-cubic lattice parameters a, as well as using equation 2 (i.e. are given in square brackets).

| Temp. (K) | Cubic fluorite<br>( <i>Fm</i> $\bar{3}$ <i>m</i> , Z = 4)                                                | Cubic bixbyite<br>( <i>I</i> $\bar{3}$ <i>a</i> , Z = 16)                                       | rh-Ce <sub>7</sub> O <sub>12</sub><br>( <i>R</i> $\bar{3}$ , Z = 3)                                                    | tri-Ce <sub>11</sub> O <sub>20</sub><br>( <i>P</i> $\bar{1}$ , Z = 1)                                                                                                                          |
|-----------|----------------------------------------------------------------------------------------------------------|-------------------------------------------------------------------------------------------------|------------------------------------------------------------------------------------------------------------------------|------------------------------------------------------------------------------------------------------------------------------------------------------------------------------------------------|
| 1273      | wt.% = 100<br><i>a</i> = 5.60423(1)<br><i>V</i> = 176.02(1)<br>δ = 0.29 [0.23]<br><i>y</i> = 0.58 [0.46] | -                                                                                               | -                                                                                                                      | -                                                                                                                                                                                              |
| 1000      | -                                                                                                        | wt.% = 100<br><i>a</i> = 11.1659(4)<br><i>V</i> = 1392.14(1)<br>δ = 0.29<br><i>y</i> = 0.58     | -                                                                                                                      | -                                                                                                                                                                                              |
| 900       | -                                                                                                        | wt.% = 96.4(8)<br><i>a</i> = 11.1503(7)<br><i>V</i> = 1386.31(1)<br>δ = 0.29<br><i>y</i> = 0.58 | wt.% = 3.6(7)<br><i>a</i> = 10.4121(7)<br><i>c</i> = 9.6789(8)<br><i>V</i> = 908.73(9)<br>δ = 0.29<br><i>y</i> = 0.58  | -                                                                                                                                                                                              |
| 600       | -                                                                                                        | wt.% = 11.4(7)<br><i>a</i> = 11.1348(3)<br><i>V</i> = 1380.55(6)<br>δ = 0.31<br><i>y</i> = 0.62 | wt.% = 66.0(9)<br><i>a</i> = 10.3738(1)<br><i>c</i> = 9.6820(1)<br><i>V</i> = 902.34(2)<br>δ = 0.30<br><i>y</i> = 0.60 | wt.% = 22.6(4)<br><i>a</i> = 6.8432(4)<br><i>b</i> = 10.3075(4)<br><i>c</i> = 6.7486(3)<br>α = 89.75(4)<br>β = 99.83(3)<br>γ = 96.23(5)<br><i>V</i> = 466.21(4)<br>δ = 0.24<br><i>y</i> = 0.48 |
| 300       | -                                                                                                        | wt.% = 12.1(7)<br><i>a</i> = 11.1088(3)<br><i>V</i> = 1370.78(8)<br>δ = 0.33<br><i>y</i> = 0.66 | wt.% = 62.4(8)<br><i>a</i> = 10.3410(1)<br><i>c</i> = 9.6493(1)<br><i>V</i> = 893.62(2)<br>δ = 0.30<br><i>y</i> = 0.60 | wt.% = 25.5(6)<br><i>a</i> = 6.8057(4)<br><i>b</i> = 10.2830(5)<br><i>c</i> = 6.7314(3)<br>α = 89.74(4)<br>β = 99.82(3)<br>γ = 96.21(5)<br><i>V</i> = 461.41(4)<br>δ = 0.24<br><i>y</i> = 0.48 |



**Table S2:** A summary of information extracted from XRD patterns by Rietveld refinement of SDC15 sample after reduction and during cooling in the flowing H<sub>2</sub> atmosphere showing weight fraction wt. [%], lattice parameters  $a, b, c$  [Å], the unit cell volume  $V$  [Å<sup>3</sup>], lattice angles  $\alpha, \beta, \gamma$  [°], oxygen vacancy parameter  $\delta$  and mole fraction  $y$  of Ce<sup>3+</sup>. The values of oxygen vacancy parameter  $\delta$  and mole fraction  $y$  of Ce<sup>3+</sup> are calculated according to the relationship between the amount of oxygen (*i.e.* 2- $\delta$ ) in CeO<sub>2- $\delta$</sub>  and the pseudo-cubic lattice parameters  $a$ , as well as using equation 2 (*i.e.* are given in square brackets).

| Temp. (K) | Cubic fluorite<br>( $Fm\bar{3}m$ , $Z = 4$ )                                                     | Cubic bixbyite<br>( $I\bar{3}a$ , $Z = 16$ )                                             | tri-Ce <sub>11</sub> O <sub>20</sub><br>( $P\bar{1}$ , $Z = 1$ )                                                                                                                                 |
|-----------|--------------------------------------------------------------------------------------------------|------------------------------------------------------------------------------------------|--------------------------------------------------------------------------------------------------------------------------------------------------------------------------------------------------|
| 1273      | wt.% = 100<br>$a = 5.58182(2)$<br>$V = 173.91(1)$<br>$\delta = 0.27$ [0.23]<br>$y = 0.39$ [0.31] | -                                                                                        | -                                                                                                                                                                                                |
| 1000      | -                                                                                                | wt.% = 100<br>$a = 11.11621(2)$<br>$V = 1373.63(1)$<br>$\delta = 0.27$<br>$y = 0.39$     | -                                                                                                                                                                                                |
| 900       | -                                                                                                | 83.5(8)%<br>$a = 11.08875(3)$<br>$V = 1363.48(1)$<br>$\delta = 0.29$<br>$y = 0.43$       | -                                                                                                                                                                                                |
| 600       | -                                                                                                | wt.% = 11.4(7)<br>$a = 11.1348(3)$<br>$V = 1380.55(6)$<br>$\delta = 0.31$<br>$y = 0.47$  | wt.% = 16.5(4)<br>$a = 6.77(2)$<br>$b = 10.2629(3)$<br>$c = 6.7698(3)$<br>$\alpha = 90.06(4)$<br>$\beta = 99.66(3)$<br>$\gamma = 96.01(5)$<br>$V = 461.65(3)$<br>$\delta = 0.23$<br>$y = 0.31$   |
| 300       | -                                                                                                | wt.% = 78.8(7)<br>$a = 11.05818(3)$<br>$V = 1352.23(6)$<br>$\delta = 0.31$<br>$y = 0.47$ | wt.% = 21.2(6)<br>$a = 6.7573(2)$<br>$b = 10.2264(2)$<br>$c = 6.7466(2)$<br>$\alpha = 90.09(2)$<br>$\beta = 99.64(3)$<br>$\gamma = 95.92(2)$<br>$V = 457.09(2)$<br>$\delta = 0.23$<br>$y = 0.31$ |
